1 Demographic Model for Inheritable Cardiac Disease

2

3 Thomas P. Burghardt

4

5 Department of Biochemistry and Molecular Biology and Physiology and Biomedical  
6 Engineering

7 200 First St. SW

8 Mayo Clinic Rochester

9 Rochester, MN 55905

10 [burghardt@mayo.edu](mailto:burghardt@mayo.edu)

11

12

13

14

15

16 April 2019

17

18

19 ABSTRACT

20 The cardiac muscle proteins, generating and regulating energy transduction during a heartbeat,  
21 assemble in the sarcomere into a cyclical machine repetitively translating actin relative to myosin  
22 filaments. Myosin is the motor transducing ATP free energy into actin movement against  
23 resisting force. Cardiac myosin binding protein C (mybpc3) regulates shortening velocity  
24 probably by transient N-terminus binding to actin while its C-terminus strongly binds the myosin  
25 filament. Inheritable heart disease associated mutants frequently modify these proteins involving  
26 them in disease mechanisms. Nonsynonymous single nucleotide polymorphisms (SNPs) cause  
27 single residue substitutions with independent characteristics (sequence location, residue  
28 substitution, human demographic, and allele frequency) hypothesized to decide dependent  
29 phenotype and pathogenicity characteristics in a feed-forward Neural network model. Trial  
30 models train and validate on a dynamic worldwide SNP database for cardiac muscle proteins  
31 then predict phenotype and pathogenicity for any single residue substitution in myosin, mybpc3,  
32 or actin. A separate Bayesian model formulates conditional probabilities for phenotype or  
33 pathogenicity given independent SNP characteristics. Neural/Bayes forecasting tests SNP  
34 pathogenicity vs (in)dependent SNP characteristics to assess individualized disease risk and in  
35 particular to elucidate gender and human subpopulation bias in disease. Evident subpopulation  
36 bias in myosin SNP pathogenicities imply myosin normally engages other sarcomere proteins  
37 functionally. Consistent with this observation, mybpc3 forms a third actomyosin interaction  
38 competing with myosin essential light chain N-terminus suggesting a novel strain-dependent  
39 mechanism adapting myosin force-velocity to load dynamics. The working models, and the  
40 integral myosin/mybpc3 motor concept, portends the wider considerations involved in  
41 understanding heart disease as a systemic maladaptation.

42 KEYWORDS

43 cardiac ventricular myosin, cardiac atrial myosin, cardiac myosin binding protein C, cardiac

44 actin, inheritable heart disease mechanism, machine learning, autonomous motor; hypertrophic

45 cardiomyopathy; dilated cardiomyopathy; restrictive cardiomyopathy; gender based risk

46 assessment

47 INTRODUCTION

48 The cardiac muscle proteins generate and regulate energy transduction during a heartbeat. They  
 49 assemble into a cyclical machine in the sarcomere that repetitively translates actin relative to  
 50 myosin filaments. Myosin is the  
 51 motor transducing ATP free energy  
 52 to the work of moving actin against  
 53 resisting force. Cardiac myosin  
 54 binding protein C (mybpc3)  
 55 regulates shortening velocity  
 56 probably by binding transiently to  
 57 actin while stably bound to the  
 58 myosin filament.

59 Myosin (**Fig 1**) has a 140  
 60 kDa N-terminal globular head  
 61 called subfragment 1 (S1) and an  
 62 extended  $\alpha$ -helical tail domain  
 63 (LMM+S2). Tail domains form  
 64 dimers that self-assemble into  
 65 myosin thick filaments with S1's  
 66 projecting outward from the core in  
 67 a helical array<sup>2</sup>. Thick filaments  
 68 interdigitate with actin thin  
 69 filaments in the sarcomere with S1's spanning the interfilament distance. S1 also has the ATP

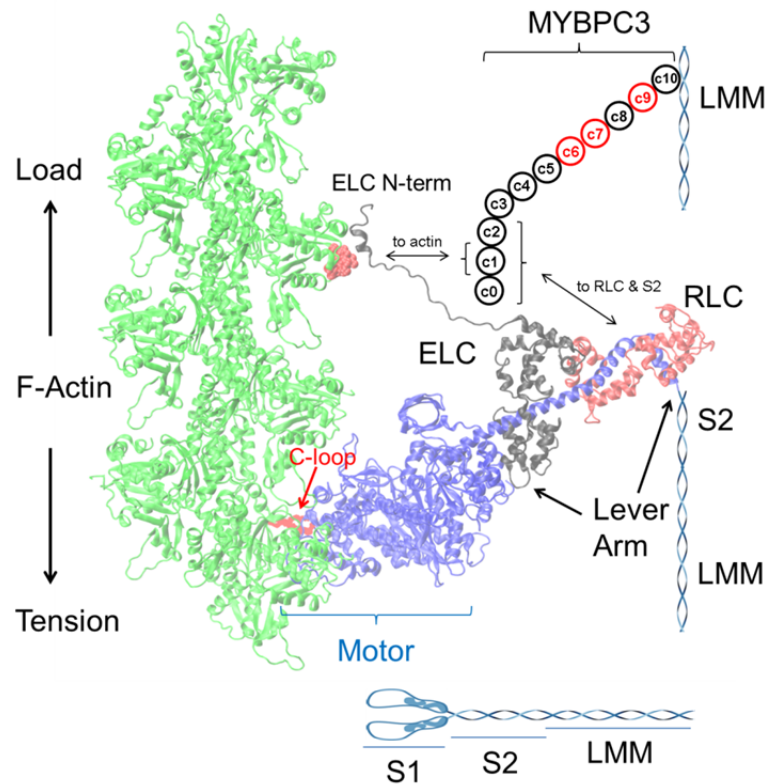

**Fig 1.** Myosin dimer proteolysis produces two subfragment 1 peptides (S1, blue), subfragment 2 (S2, blue), and light meromyosin (LMM, blue). S1 has a motor domain and lever arm with bound light chains ELC (black) and RLC (red). The motor binds to an actin filament and rotates the lever arm generating torque to apply tension on F-actin (green). The ELC N-terminus also binds actin to modulate myosin step-size. Mybpc3 has 11 domains with c10 binding myosin LMM and with c0-c2 maintaining transient interactions with actin, myosin S2, and RLC (mybpc3 domains in black or red). The actin binding site for mybpc3 (red space filling atoms) is proximal to the actin binding site for the ELC N-terminus.

70 binding site and a lever arm whose rotary movement cyclically applies tension to strongly bound  
71 actin<sup>3</sup>. The lever arm complex, stabilized by bound essential and regulatory light chains (ELC  
72 and RLC)<sup>4-7</sup>, converts torque generated by the motor into linear displacement.

73 Cardiac myosin binding protein C localizes to the C-zone of the muscle sarcomere and  
74 regulates the actomyosin sliding velocity<sup>8</sup>. It has 11 immunoglobulin-like (Ig) or fibronectin-like  
75 (Fn) globular domains (c0-c10) resembling a pearl necklace with c0 near the N-terminus. The c0  
76 Ig-like domain is unique to the cardiac isoform studied here<sup>9</sup>. The protein contains several sites  
77 for serine, and one site for threonine, phosphorylation and involving phosphokinase A (PKA)  
78 and PKC in its regulation. The mybpc3 C-terminus associates with the myosin thick filament<sup>10</sup>.  
79 The mybpc3 N-terminus associates with myosin S2<sup>11</sup>, RLC<sup>12</sup> and with F-actin in vitro<sup>13-15</sup> and  
80 in intact muscle<sup>16, 17</sup> (**Fig 1**). The role of mybpc3 in cardiac muscle regulation is extensively  
81 studied and associates with modulation of contractile force-velocity<sup>11, 18, 19</sup>, myosin S2 stability  
82<sup>11</sup>, and myosin super-relaxation<sup>20</sup>. As relates to modulation of force-velocity, we propose  
83 mybpc3 both resembles and competes with ELC because its transient actomyosin crosslink  
84 affects movement and it binds actin at the same site as the ELC N-terminus. We suggest it is a  
85 fourth subunit of the motor after myosin heavy chain (MHC), RLC, and ELC.

86 Actin has two major domains separated by a nucleotide-binding cleft that are further  
87 subdivided into subdomains 1 and 2, and, 3 and 4<sup>21</sup>. In their strong binding state, actin and  
88 cardiac myosin make multiple contacts over 3 actin monomers in the actin (thin) filament as  
89 show in **Fig 1**<sup>22</sup>. These contacts in actin include residues in all 4 subdomains<sup>23</sup>. In myosin they  
90 included notable structured<sup>24, 25</sup> and unstructured surface loops<sup>26</sup> usually involving ionic  
91 interactions, hydrophobic regions on the myosin surface<sup>27</sup>, and a unique contact between actin

92 and the myosin ELC N-terminus<sup>28-30</sup>. These contacts modulate actin activation of the myosin  
93 ATPase, actin affinity for myosin and, myosin step-size<sup>31</sup>.

94 Human heart diseases link to variations in myosin, actin, and mybpc3 with diverse  
95 phenotypes reflecting modifications to cardiac muscle mechanochemistry. The depth and breadth  
96 of cardiac myosin<sup>32, 33</sup>, actin<sup>1, 23</sup>, and mybpc3<sup>9, 17</sup> structural characterization is unique due to  
97 vigorous scientific interest driven by desires to positively affect human health and to understand  
98 a natural nanomotor design. Missense single nucleotide polymorphisms (SNPs) are clues for  
99 understanding cardiovascular disease mechanism quantitated here in an extensive database  
100 containing mutant location in a protein domain (domain), residue substitution (sidechain), human  
101 population group (demographic), and prevalence (frequency) as independent variables that imply  
102 the dependent disease phenotype and pathogenicity characteristics. The unknown disease model  
103 mechanism is surmised implicitly using a feed-forward neural network then interpreted explicitly  
104 with a discrete Bayes network for Neural/Bayes forecasting as already described<sup>34</sup>. Involvement  
105 of the independent demographic and frequency characteristics is new to this application as is the  
106 application to actin. Neural/Bayes forecasting tests pathogenicity vs demographics of mutations  
107 in different protein domains. It provides a prognosis that assesses individual risk due to genetic  
108 background and gender, and, identifies protein domains and inter-protein interactions critical to  
109 disease mechanisms.

110

111

112

## 113 2. METHODS

114 *2.1 SNP data retrieval.* An automated search/fetch Perl script downloads the SNP reference  
115 numbers (rs#) from the National Center for Bioinformatics (NCBI) SNP database for the human  
116 cardiac myosin heavy and light chains, actin, and mybpc3 genes. Automated extraction of other  
117 information from the NCBI SNP database uses database text search/extract tools in Mathematica  
118 (Wolfram, Champaign, IL, USA) collecting location in the protein sequence, residue  
119 substitution, population demographic, allele frequency, and the clinical data set assigning  
120 pathogenicity and phenotype. Clinical phenotype and pathogenicity data is frequently unfulfilled  
121 (presumed unknown), inconclusive (presumed unknown), or contradictory among data  
122 submitters. We inspected the clinical data when results from data submitters conflicted and  
123 reached consensus by requiring two or more reports to agree. Otherwise, when there is no  
124 consensus, the result was presumed unknown.

125 Human ventricular  $\beta$ cardiac myosin ( $\beta$ mys) is encoded in the MYH7 (MHC), MYL3  
126 (ELC), and MYL2 (RLC) genes. Human atrial  $\alpha$ cardiac myosin ( $\alpha$ mys) is encoded by the  
127 MYH6 (MHC), MYL4 (ELC), and MYL7 (RLC) genes. Human mybpc3 is encoded by the  
128 MYPBC3 gene. Human actin is encoded by the ACTC1 gene.

129

130 *2.2 Network configuration.* Trial network configurations associate mutant ( $\mu$ ) location in the  
131 protein domain (cd), residue substitution (re), population demographic (po), and SNP allele  
132 frequency (af) in a causal relationship with phenotype (ph) and pathogenicity (pa) in model  
133 configurations denoted in **Fig 2**.

134 All protein domains and their 2 letter  
135 abbreviations are indicated in Supplementary  
136 Information (SI) **Tables S1 and S2**. Myosin domains  
137 (cd) include 27 functional sites as described previously  
138 <sup>34</sup>.  $\beta$ mys and  $\alpha$ mys heavy chains have identical  
139 sequences except that  $\alpha$ mys has single residue insertions  
140 at N211 and G634 ( $\alpha$ mys numbering) that slightly alter  
141 the domain assignments. The myosin light chain domain  
142 designations are unaffected by sequence differences  
143 between  $\beta$ mys and  $\alpha$ mys. Mybpc3 and cardiac actin  
144 domains include 26 and 28 sites. Every SNP in the  
145 database has an assigned domain. **Fig 3** shows linear representations of myosin, actin, and  
146 mybpc3 indicating mutual binding sites and the locations of domains listed in **SI Tables S1 and**  
147 **S2**.

148

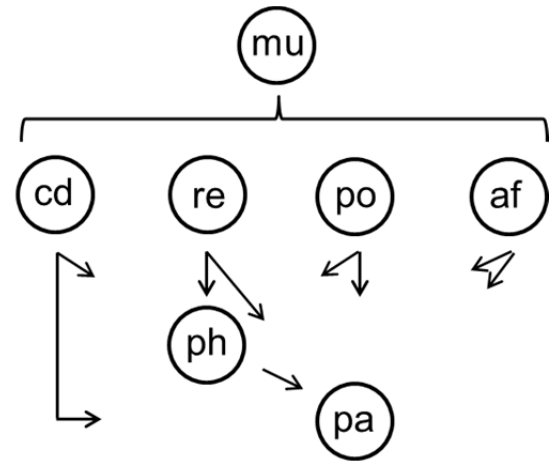

**Fig 2.** Configuration denoting relationships among mutant (mu) location (cd), residue substitution (re), population demographic (po), allele frequency (af), phenotype (ph), and pathogenicity (pa) that model the structure/function influence pathway in neural and Bayes networks.



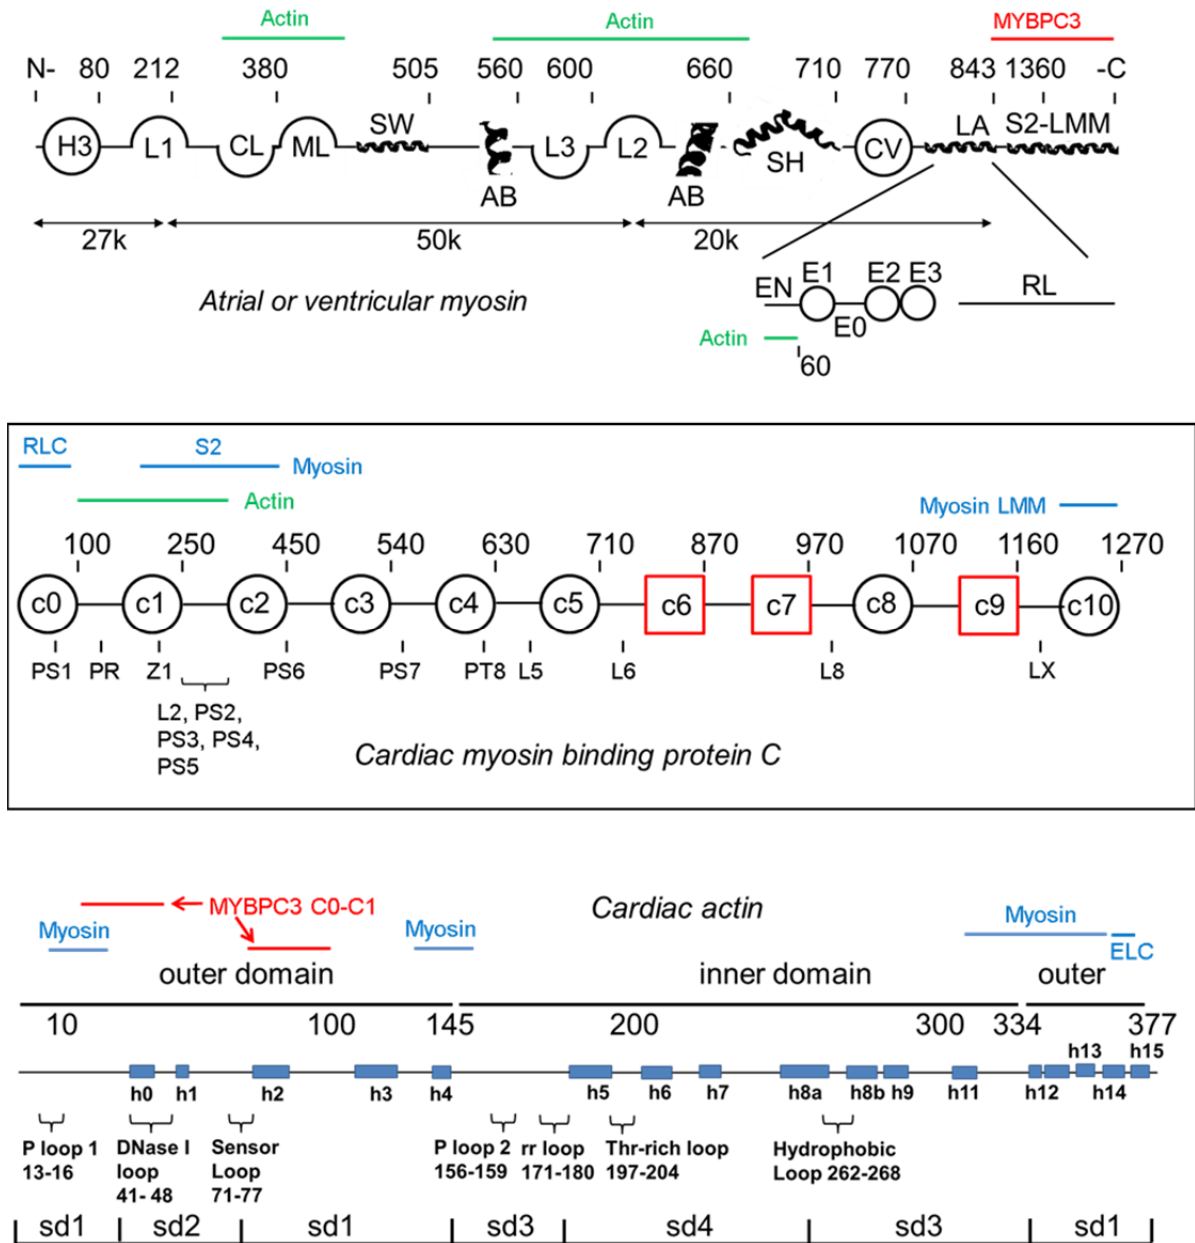

**Fig 3.** Linearized diagrams for cardiac myosins (top), mybpc3 (middle), and actin (bottom) identifying most domains defined in SI Tables S1 and S2. The myosin diagram does not indicate the active site (ac), OM binding site (om), and mesa (me) because they occupy multiple regions in the linearized representation. Myosin light chains appear below the heavy chain. Actin and MYBPC3 binding sites are indicated in green and red above the heavy chain and below the ELC. The mybpc3 diagram consists of 8 Ig-like domains (black circles) and 3 fibronectin-like domains (red squares). Phosphorylation sites (PS or PT) are indicated below the chain. Domain linkers of interest include the proline rich linker (PR) and L2 containing a regulatory site. Z1 is a zinc binding site. Myosin S2 and LMM and actin binding sites on mybpc3 are indicated above the linearized model. The cardiac actin diagram consists of  $\alpha$ -helical segments (h0-h15) and looping regions indicated with brackets <sup>1</sup>. Domain structure divides the molecule into outer and inner domains and four subdomains (sd1-4). Myosin and mybpc3 binding sites on actin are indicated above the linearized model in blue and red.

150 Residue substitution (*re* in **Fig 2**) refers to the reference and substituted residue (*ref/sub*)  
151 pair. Possible *ref/sub* combinations have 420 possibilities for 21 amino acids. A hydrophobicity  
152 index was derived from model peptide studies on the stability of amphipathic  $\alpha$ -helices. It ranks  
153 residues as hydrophilic (*p*), neutral (*n*), hydrophobic (*m*), and very hydrophobic (*h*)<sup>35</sup>. The  
154 descriptive index simplifies residue substitution to a more tractable 16 *ref/sub* pairs  
155 characterizing every mutation. Input residue substitution pairs and their 2 letter abbreviations  
156 indicated in **SI Table S3** summarizes input indicated by *re* in the **Fig. 2** model. In addition, each  
157 residue is assigned an integer score whose difference for a *ref/sub* pair (the *ref/sub* score  $\Delta$ )  
158 ranges from  $-3$  for hydrophilic/very-hydrophobic pairs to  $+3$  for very-hydrophobic/hydrophilic  
159 pairs. The *ref/sub* scores are also indicated in **SI Table S3**.

160 Residue substitution prevalence (allele frequency or *af* in **Fig 2**) in the human population  
161 group (demographic or *po* in **Fig 2**) fill out the independent parameters in the network.  
162 Demographic groups (*po*) and their 3 letter abbreviations are indicated in **SI Table S4**. We will  
163 use subsets of these demographic groups pertaining to ethnic identity or gender as indicated in  
164 **Table S4** to draw attention to interesting data tendencies. Allele frequency is a continuous  
165 variable in the database on the interval  $0 \leq af \leq 1$  for 1 meaning all alleles are substituted by the  
166 SNP. These data are subdivided into the three discrete categories indicated in **SI Table S5**.

167 Phenotype (*ph*) and pathology (*pa*) data have standardized classifications for  
168 cardiovascular disease. A total of 13 phenotypes for cardiac myosin, *mybpc3*, and cardiac actin  
169 from the NCBI SNP database include hypertrophic cardiomyopathy (*hc*), dilated cardiomyopathy  
170 (*dc*), restrictive cardiomyopathy (*rc*), left ventricle noncompaction cardiomyopathy (*lv*),  
171 cardiomyopathy (*cm*), congenital myopathy (*gm*), atrial fibrillation (*af*), ventricular fibrillation  
172 (*vf*), ventricular tachycardia (*vt*), cardiovascular phenotype (*cp*), atrial septal defect (*ad*), native

173 (nv), and unknown (uk). Cardiomyopathy (cm) describes apparent heart conditions in which  
174 specific etiologies are not clearly identified. Cardiovascular phenotype (cp) describes conditions  
175 affecting the cardiovascular system but not directly the myocardium (e.g. valvulopathies, aortic  
176 coarctation)<sup>36, 37</sup>. Congenital myopathy (gm) are muscular diseases of genetic etiology that  
177 rarely affects the heart. Left ventricle noncompaction (lv) and atrial septal defect (ad) are heart  
178 developmental defects sometimes leading to secondary cardiomyopathy due to hemodynamic  
179 abnormalities. This phenotype list is also indicated in **SI Table S6**.

180 Pathogenicity (pa) is likewise taken from the  
181 NCBI SNP database and includes pathogenic (pt),  
182 likely pathogenic (lp), benign (be), likely benign  
183 (lb), and unknown (uk). The pathogenicities and  
184 their 2 letter codes are summarized in **Table 1**.

| pathogenicity         | code |
|-----------------------|------|
| (p)a(t)hogenic        | pt   |
| (l)ikely (p)athogenic | lp   |
| (be)nign              | be   |
| (l)ikely (b)enign     | lb   |
| (u)n(k)nown           | uk   |

185 **Table 1.** Pathogenicity (pa) with 2 letter  
186 codes

186 *2.2 SNP neural network.* The neural network  
187 modeling structure/function influences from disease follow from the model in **Fig 2**. They relate  
188 domain position (cd), residue substitution (re), population (po), and allele frequency (af) inputs  
189 to phenotype and pathogenicity outputs through 4 fully connected linear (hidden) and dropout  
190 layers with 304 or 252 nodes each, and, a softmax layer conditioning output for digital  
191 classification of phenotype and pathogenicity as indicated in **Fig 4**. Dropout layers mitigate  
192 overtraining. Training data contains 50% of the fulfilled 6ddps.

193 Trial training data sets of fulfilled 6ddps are selected randomly from the validation data  
194 set but subject to the constraint that each phenotype and pathogenicity outcome must be

195 represented in the set except when their representation in the fulfilled 6ddp's is  $<2$  occurrences.  
196 Learnable weights for the linear layers are randomly initialized. Weight initializations are  
197 normally distributed with zero mean and standard deviation of  $(1/n)^{1/2}$  (for  $n$  inputs). Bias is  
198 initialized to zero. A total of 1800 trials generate the 20 best implicit models. This process is  
199 repeated 5 times and the results (100 total models) are combined into 24-25 best-of-the-best  
200 implicit models. These 24-25 neural networks embody distinct implicit models for disease that  
201 are sufficiently diverse to cause normally distributed estimates for Bayes network probabilities  
202 (discussed below) implying that they randomly sample the set of good implicit disease models.

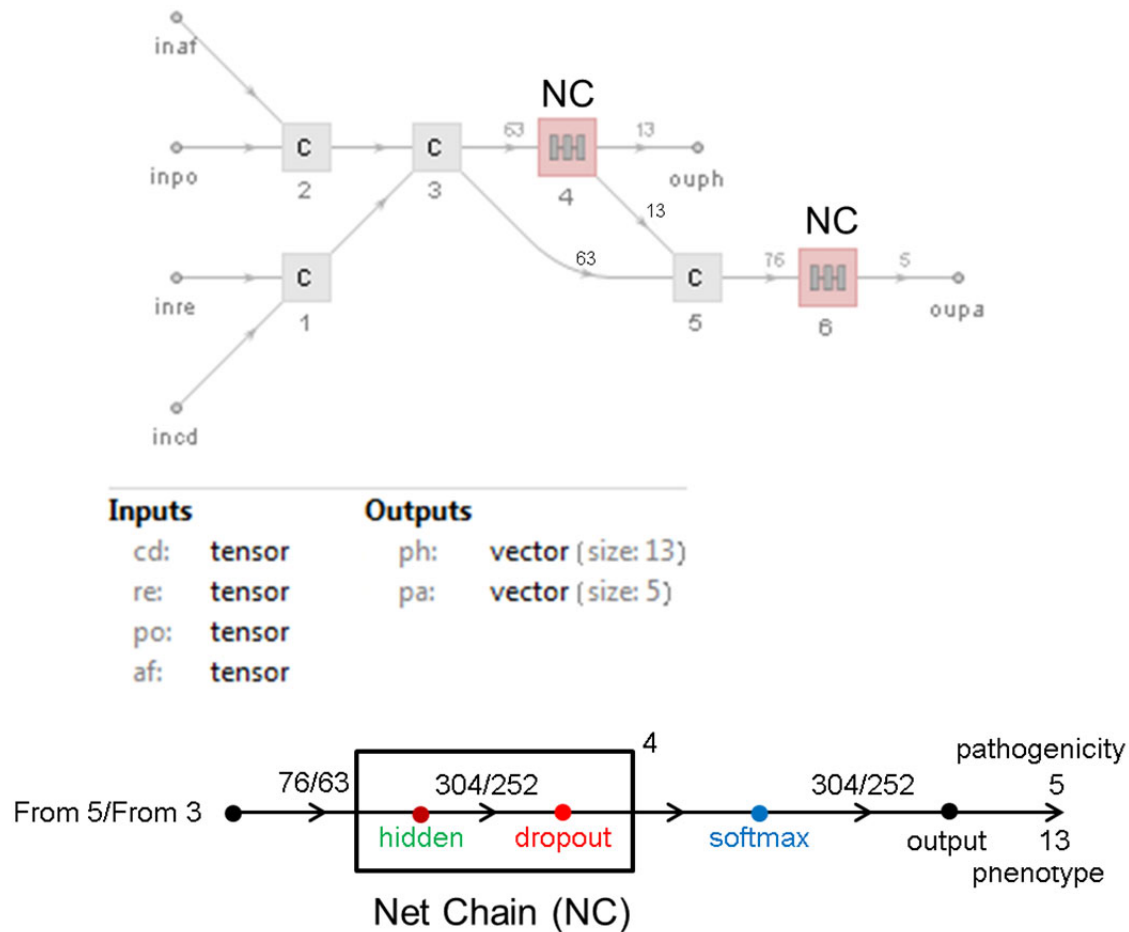

**Fig 4.** Feed forward neural nets relating inputs for the site of the modification (cd), residue substitutions (re), population (po), and allele frequency (af) with disease phenotype (ph) and pathogenicity (pa) in the models corresponding to those in Fig 2. The Net Chain (NC), depicted in the lower half of the figure, is a component in the model in the upper half. Numbers above the horizontal line are nodes. Four connected hidden layers are indicated by the superscripted 4.

204

205 *2.3 Neural network validation.* The ability to correctly classify new SNPs (new-unknown data  
206 corresponding to new unfulfilled 6ddps) measures suitability of a neural network trial. We set  
207 aside fulfilled 6ddps to be the new-unknown dataset but from the part of the validation data pool  
208 that does not include training data since a real new-unknown could never be a part of training.  
209 Each new-unknown 6ddp has its position and substitution assignment evaluated by the neural  
210 network trial with the output phenotype and pathogenicity compared to the know value. This  
211 comparison is the new-unknown predictor metric that we use to rank neural network model  
212 suitability.

213 The best model neural networks (ranked by their new-unknown predictor metric) predict  
214 unfulfilled (ph, pa) outputs from their domain position (cd), residue substitution (re), population  
215 (po), and allele frequency (af) assignments. Fulfilled and predicted outputs combined are the  
216 database for Bayes network (**Fig 2**) tasked with formulating a statistics based myosin, mybpc3,  
217 or actin structure/function mechanism as described in the next section.

218

219 *2.4 Bayes network modeling of myosin structure/function.* **Fig 2** shows the Bayes network model.  
220 Arrows imply a direction for influence hence the domain (cd), residue substitution (re),  
221 population (po), and allele frequency (af) assignment implies a probability for phenotype (ph)  
222 and pathogenicity (pa). Datasets 6ddpMYH7.xls, 6ddpMYH6.xls, 6ddpMYBPC3.xls, and  
223 6ddpACTC1.xls in SI show the fulfilled and unfulfilled 6ddps for  $\beta$ mys,  $\alpha$ mys, mybpc3, and  
224 actin containing 4523, 6649, 4003, and 170 variations in the database corresponding to 1877,  
225 1798, 1181, and 131 distinct residue substitutions. Combined fulfilled and predicted 6ddp data

226 sets are expressed as conditional probability tables (CPT's, eq. 1) defining the joint probability  
227 density (left hand side of eq. 1) representing the networks in **Fig 2** such that,

$$P[cd, re, po, af, ph, pa] = P(pa|ph, cd, re, po, af)P(ph|cd, re, po, af) \quad (1)$$

228

229 We use this statistical method to query pathogenicity (pa) or phenotype (ph) probability due to  
230 protein residue domain (cd), substitution (re), population (po), and allele frequency (af).

231

232 *2.5 Significance testing.* We tested reproducibility and significance of the cardiac disease models  
233 by generating a large pool of implicit neural network models in the **Fig 2** configuration. Models  
234 are independent solutions to this highly constrained problem that are ranked for reliability by the  
235 new-unknown predictor metric. We used the ranked model solutions to estimate the collective  
236 quantities described subsequently in RESULTS related to demographics for each protein  
237 sequence. Best ranked model solutions formed a finite subset for each protein drawn from the  
238 larger pool of independent solutions. Model solution members in each subset were increased  
239 (best solutions by the new-unknown predictor metric used first) until the collective quantities  
240 were unchanged by further enlargement of the subset. This selection process favored model  
241 subsets best approximating the real disease mechanism by minimizing random error but is  
242 unlikely to address systematic model limitations. Each model solution in a subset exactly  
243 reproduces 80-92% of the known 6ddps in the target protein constraining potential systematic  
244 errors in the models to just 8-20%.of the dataset and implying the measure of their reliability,

245 however, potential systematic errors will not affect relationships indicated within the target  
246 protein model solutions described in RESULTS.

247 One-way ANOVA with Bonferroni or Tukey-Kramer post-tests for the  $p < 0.01$  or  $p <$   
248  $0.05$  significance levels are used for all significance testing when a significance level ( $p$ ) is  
249 mentioned.



### 250 3. RESULTS

251 We applied the Neural/Bayes network models for disease in **Fig 2** to ventricular and atrial  
252 cardiac myosin, mybpc3, and cardiac actin to investigate inheritable cardiac disease  
253 demographics versus the mutant location in protein functional domains. Given human  
254 populations listed in **SI Table S4**, pathogenic or benign outcome probabilities were calculated  
255 for nonsynonymous SNPs falling into the functional protein domains represented schematically  
256 in **Fig 3** and listed in **SI Tables S1-S2**. Results are from using the 24-25 independent best-of-the-  
257 best implicit models for each protein's contribution to the contractile mechanism. Models  
258 selected satisfy the reproducibility and significance testing described in METHODS (section  
259 2.5).

260 Pathogenicity is summarized as either pathogenic or benign by combining likely-  
261 pathogenic with pathogenic probabilities or likely-benign with benign probabilities (see **Table**  
262 **1**). Demographic probabilities for each protein functional domain and pathogenicity category  
263 were computed with Bayesian statistics as described<sup>34</sup> and listed in **SI Tables S7-S10**. An  
264 example from that data for a single functional domain in  $\beta$ mys is shown in **Fig 5**. There are 26-  
265 28 domains for the proteins considered suggesting that a baseline contribution to pathogenicity  
266 probability for each functional domain is ~3% of the total. We split this probability between  
267 pathogenic and benign categories suggesting domains contributing significantly and specifically  
268 to function will likely contribute >1% to each category. We refer to these domains as qualified  
269 functional domains (QFDs). SNPs in QFDs cause pathogenic and benign outcomes by selective  
270 residue substitutions suggesting their side chains are specifically involved in sarcomere function  
271 and implying that their demographic trends are reliable.

| <b><math>\beta</math>mys Pathogenic Summary</b>                        |          |           |                                              |                                            | <b><math>\beta</math>mys Benign Summary</b>                            |          |          |                                              |                                            |
|------------------------------------------------------------------------|----------|-----------|----------------------------------------------|--------------------------------------------|------------------------------------------------------------------------|----------|----------|----------------------------------------------|--------------------------------------------|
| Pathogenic                                                             | cd → en  | QFD 2     |                                              |                                            | Benign                                                                 | cd → en  | QFD 2    |                                              |                                            |
| $\langle P(\text{cd} \text{po}) \rangle_N$                             | SD       | po        | W(D <sub>a</sub> /S <sub>i</sub> )<br>24 sol | $\langle P(\text{cd} \text{af}) \rangle_N$ | $\langle P(\text{cd} \text{po}) \rangle_N$                             | SD       | po       | W(D <sub>a</sub> /S <sub>i</sub> )<br>24 sol | $\langle P(\text{cd} \text{af}) \rangle_N$ |
| 0.000631                                                               | 0.000174 | ESP       | 120                                          | 0.000016                                   | 0.001204                                                               | 0.000178 | EUR      | 144                                          | 0.000019                                   |
| 0.000474                                                               | 0.000123 | ExA       | 576                                          | 0.000075                                   | 0.001140                                                               | 0.000148 | AMR      | 456                                          | 0.000059                                   |
| 0.000471                                                               | 0.000148 | MAL       | 408                                          | 0.000053                                   | 0.001134                                                               | 0.000180 | OTH      | 936                                          | 0.000122                                   |
| 0.000460                                                               | 0.000146 | ASJ       | 408                                          | 0.000053                                   | 0.001134                                                               | 0.000148 | EAS      | 456                                          | 0.000059                                   |
| 0.000457                                                               | 0.000122 | AFR       | 456                                          | 0.000059                                   | 0.001113                                                               | 0.000147 | FIN      | 408                                          | 0.000053                                   |
| 0.000455                                                               | 0.000112 | FEM       | 408                                          | 0.000053                                   | 0.001097                                                               | 0.000145 | NFE      | 408                                          | 0.000053                                   |
| 0.000455                                                               | 0.000267 | SAS       | 144                                          | 0.000019                                   | 0.001092                                                               | 0.000268 | SAS      | 144                                          | 0.000019                                   |
| 0.000449                                                               | 0.000144 | NFE       | 408                                          | 0.000053                                   | 0.001091                                                               | 0.000113 | FEM      | 408                                          | 0.000053                                   |
| 0.000433                                                               | 0.000146 | FIN       | 408                                          | 0.000053                                   | 0.001088                                                               | 0.000122 | AFR      | 456                                          | 0.000059                                   |
| 0.000414                                                               | 0.000147 | EAS       | 456                                          | 0.000059                                   | 0.001086                                                               | 0.000147 | ASJ      | 408                                          | 0.000053                                   |
| 0.000408                                                               | 0.000178 | OTH       | 936                                          | 0.000122                                   | 0.001075                                                               | 0.000149 | MAL      | 408                                          | 0.000053                                   |
| 0.000405                                                               | 0.000147 | AMR       | 456                                          | 0.000059                                   | 0.001073                                                               | 0.000126 | ExA      | 576                                          | 0.000075                                   |
| 0.000342                                                               | 0.000177 | EUR       | 144                                          | 0.000019                                   | 0.000913                                                               | 0.000174 | ESP      | 120                                          | 0.000016                                   |
| $\langle \langle P(\text{cd} \text{po}) \rangle_N \rangle_{\text{po}}$ | SD       | SD%       | x                                            | $\Sigma x$                                 | $\langle \langle P(\text{cd} \text{po}) \rangle_N \rangle_{\text{po}}$ | SD       | SD%      | x                                            | R                                          |
| 0.000450                                                               | 0.000065 | 14.482866 | 0.012642                                     | 0.043394                                   | 0.001095                                                               | 0.000066 | 5.981167 | 0.030753                                     | -0.828029                                  |

**Fig 5.** Demographic probabilities and statistics for populations (po) in columns ranking most to least likely from top to bottom. This example for the ELC N-terminus domain (en) from  $\beta$ mys is taken from **SI Table S7**. En domain is a QFD in  $\beta$ mys. Quantities are defined in the text.

272

273 Protein domains included in a result for a given protein are those represented in each of

274 the 24-25 implicit models and for both pathogenic and benign outcomes. The example matrices

275 in **Fig 5** are for the ELC N-terminus domain (en). It is a QFD and drawn verbatim from the

276 complete results in **SI Table S7**. In **Fig 5** and **SI Table S7**, large side-by-side matrices are for

277 pathogenic (left) or benign (right) pathogenicity while both matrices pertain to the same

278 functional domain (cd, coded in the first row). Probabilities (first column) are an average over

279 24-25 best-of-the-best implicit models (under heading  $\langle P(\text{cd}|\text{po}) \rangle_N$ , where  $N$  is 24-25) for

280 population demographic (po) in the third column. SD (standard deviation, second column)

281 measures the spread. The number of 6ddps contributing to the probability, indicated in column 4,

282 combine SNP data from NCBI when known (Da for data) with that from estimates by the neural  
283 network when unknown (Si for simulated) from 24 implicit models (sol). Mean allele frequency  
284 from the contributing 6ddps (under heading  $\langle P(\text{cd}|\text{af}) \rangle_N$ ), appears in column 5. N-averaged  
285 probabilities in column 1 are themselves averaged over the populations to obtain the value in the  
286 bottom row under the heading  $\langle\langle P(\text{cd}|\text{po}) \rangle_N \rangle_{\text{po}}$  and with spread below the lower SD in column  
287 2. The quantity indicated by  $x$  is the total protein domain probability for pathogenic (left matrix)  
288 and benign (right matrix) outcomes hence they are comparable horizontally (over pathogenicity)  
289 for a given protein domain and vertically among the different protein domains. A domain is a  
290 QFD (see Methods section 2.5) when  $x \geq 0.01$  for both pathogenic and benign categories ( $en$  is a  
291 QFD in **Fig 5**). All  $x$  quantities for a given protein (seen in **SI Tables S7-S10**) do not sum to 1  
292 because  $x$  from some domains are not represented in both pathogenic and benign categories and  
293 are not included in the tables. The  $\Sigma x$  appearing only on the pathogenic side indicates the sum of  
294  $x$  for pathogenic and benign cases in the same domain (i.e., side-by-side matrices). Pearson's  $r$   
295 ( $R$ ) spans the dynamic range  $-1 \leq R \leq 1$  and measures linear correlation between the integer  
296 sequence counting three or more populations in column 3 and declining probabilities in column  
297 1. It is assigned the largest magnitude value for pathogenic and benign cases in each protein  
298 domain and appears only on the benign side. It relates correlation strength for probability vs  
299 demographics over the protein functional domains. The  $R$ -correlation range over functional  
300 domains in  $\beta\text{mys}$ ,  $\alpha\text{mys}$ ,  $\text{mybpc3}$ , or  $\text{act1}$  is listed in the last row of **SI Tables S7-S10**.

301 The detailed results in **Tables S7-S10** are broadly summarized by significance tested  
302 estimates for most and least overall pathogenic or most and least overall benign ethnic  
303 population or gender in **Fig 6**. The *summary ranking* estimates identify the demographic that  
304 consistently ranks highest or lowest in pathogenic outcomes over the entire protein as measured

305 directly by pathogenicity or indirectly by the lowest or highest ranking in benign outcomes.  
306 Summary ranking is a qualitative measure for heart disease burden in a demographic and is done  
307 in two ways. The first using Bayes statistics that is appropriately weighted by normalized  
308 probabilities and a second simpler approach that permits easier comparison with quantitative  
309 results in **SI Tables S7-S10**. The second method does not preserve relative weighting of  
310 functional domains but requires that included functional domains have  $\geq 1\%$  of the total  
311 probability for pathogenic or benign outcomes. This is different from the QFD rule where both  
312 pathogenic and benign outcomes must qualify with  $\geq 1\%$  of the total probability. In the second  
313 method ranking 1<sup>st</sup> or 2<sup>nd</sup> at the high end of the demographic probability listing (column 1 in the  
314 qualified matrices from **SI Tables S7-S10**) earns a 3 or 1 score while ranking lowest or second  
315 from lowest in the probability listing earns a -3 or -1 score. These integers are replaced by real  
316 probabilities, but keeping the sign assignment, for the Bayes statistics method. Both methods  
317 give identical ranking of data used here. When gender is the population group, 2 quantities are  
318 involved and scores rank first or last positions with 1 or -1 or the appropriately signed probability  
319 for the Bayes statistics method. Smaller matrices in **Fig 6** show summary rankings and numerical  
320 scores for ethnic population or gender subsets over protein domains that contribute  $>1\%$   
321 probability to pathogenic (left) or benign (right) outcomes. Ethnic (eg., AFR or EUR) and gender  
322 subsets are defined in **SI Table S4**.

323

324

325

|              |                                                                                                                                                                                                                                                                                                                                                                                                                                                                                                                                                                                                                                                                                                                                                    |            |      |         |        |         |          |      |         |    |         |       |   |   |   |      |       |   |   |   |      |     |     |     |     |     |     |     |     |     |     |     |     |     |    |    |     |     |     |    |    |     |     |          |      |      |      |      |          |      |      |
|--------------|----------------------------------------------------------------------------------------------------------------------------------------------------------------------------------------------------------------------------------------------------------------------------------------------------------------------------------------------------------------------------------------------------------------------------------------------------------------------------------------------------------------------------------------------------------------------------------------------------------------------------------------------------------------------------------------------------------------------------------------------------|------------|------|---------|--------|---------|----------|------|---------|----|---------|-------|---|---|---|------|-------|---|---|---|------|-----|-----|-----|-----|-----|-----|-----|-----|-----|-----|-----|-----|-----|----|----|-----|-----|-----|----|----|-----|-----|----------|------|------|------|------|----------|------|------|
|              | <table border="0"> <tr> <td>Pathogenic</td><td>Rank</td><td>from</td><td>12</td><td>domains</td> <td>Benign</td><td>Rank</td><td>from</td><td>2</td><td>domains</td> </tr> <tr> <td>Least</td><td>→</td><td>→</td><td>→</td><td>Most</td> <td>Least</td><td>→</td><td>→</td><td>→</td><td>Most</td> </tr> <tr> <td>EUR</td><td>AMR</td><td>...</td><td>ASJ</td><td>AFR</td> <td>ASJ</td><td>CEP</td><td>...</td><td>EUR</td><td>AMR</td> </tr> <tr> <td>-24</td><td>-15</td><td>...</td><td>15</td><td>18</td> <td>-3</td><td>-3</td><td>...</td><td>3</td><td>4</td> </tr> <tr> <td>---</td><td>---</td><td>p &lt; 0.01</td><td>**--</td><td>**--</td> <td>----</td><td>----</td><td>p &lt; 0.05</td><td>----</td><td>----</td> </tr> </table>    | Pathogenic | Rank | from    | 12     | domains | Benign   | Rank | from    | 2  | domains | Least | → | → | → | Most | Least | → | → | → | Most | EUR | AMR | ... | ASJ | AFR | ASJ | CEP | ... | EUR | AMR | -24 | -15 | ... | 15 | 18 | -3  | -3  | ... | 3  | 4  | --- | --- | p < 0.01 | **-- | **-- | ---- | ---- | p < 0.05 | ---- | ---- |
| Pathogenic   | Rank                                                                                                                                                                                                                                                                                                                                                                                                                                                                                                                                                                                                                                                                                                                                               | from       | 12   | domains | Benign | Rank    | from     | 2    | domains |    |         |       |   |   |   |      |       |   |   |   |      |     |     |     |     |     |     |     |     |     |     |     |     |     |    |    |     |     |     |    |    |     |     |          |      |      |      |      |          |      |      |
| Least        | →                                                                                                                                                                                                                                                                                                                                                                                                                                                                                                                                                                                                                                                                                                                                                  | →          | →    | Most    | Least  | →       | →        | →    | Most    |    |         |       |   |   |   |      |       |   |   |   |      |     |     |     |     |     |     |     |     |     |     |     |     |     |    |    |     |     |     |    |    |     |     |          |      |      |      |      |          |      |      |
| EUR          | AMR                                                                                                                                                                                                                                                                                                                                                                                                                                                                                                                                                                                                                                                                                                                                                | ...        | ASJ  | AFR     | ASJ    | CEP     | ...      | EUR  | AMR     |    |         |       |   |   |   |      |       |   |   |   |      |     |     |     |     |     |     |     |     |     |     |     |     |     |    |    |     |     |     |    |    |     |     |          |      |      |      |      |          |      |      |
| -24          | -15                                                                                                                                                                                                                                                                                                                                                                                                                                                                                                                                                                                                                                                                                                                                                | ...        | 15   | 18      | -3     | -3      | ...      | 3    | 4       |    |         |       |   |   |   |      |       |   |   |   |      |     |     |     |     |     |     |     |     |     |     |     |     |     |    |    |     |     |     |    |    |     |     |          |      |      |      |      |          |      |      |
| ---          | ---                                                                                                                                                                                                                                                                                                                                                                                                                                                                                                                                                                                                                                                                                                                                                | p < 0.01   | **-- | **--    | ----   | ----    | p < 0.05 | ---- | ----    |    |         |       |   |   |   |      |       |   |   |   |      |     |     |     |     |     |     |     |     |     |     |     |     |     |    |    |     |     |     |    |    |     |     |          |      |      |      |      |          |      |      |
| $\beta$ mys  | <table border="0"> <tr> <td>Pathogenic</td><td>Rank</td><td>from</td><td>9</td><td>domains</td> <td>Benign</td><td>Rank</td><td>from</td><td>2</td><td>domains</td> </tr> <tr> <td>Least</td><td>→</td><td>→</td><td>→</td><td>Most</td> <td>Least</td><td>→</td><td>→</td><td>→</td><td>Most</td> </tr> <tr> <td>FEM</td><td>...</td><td>...</td><td>MAL</td><td></td> <td>MAL</td><td>...</td><td>...</td><td>FEM</td><td></td> </tr> <tr> <td>-5</td><td>...</td><td>...</td><td>5</td><td></td> <td>-2</td><td>...</td><td>...</td><td>2</td><td></td> </tr> <tr> <td>-*</td><td></td><td>p &lt; 0.05</td><td>*-</td><td></td> <td>-*</td><td></td><td>p &lt; 0.05</td><td>*-</td><td></td> </tr> </table>                                     | Pathogenic | Rank | from    | 9      | domains | Benign   | Rank | from    | 2  | domains | Least | → | → | → | Most | Least | → | → | → | Most | FEM | ... | ... | MAL |     | MAL | ... | ... | FEM |     | -5  | ... | ... | 5  |    | -2  | ... | ... | 2  |    | -*  |     | p < 0.05 | *-   |      | -*   |      | p < 0.05 | *-   |      |
| Pathogenic   | Rank                                                                                                                                                                                                                                                                                                                                                                                                                                                                                                                                                                                                                                                                                                                                               | from       | 9    | domains | Benign | Rank    | from     | 2    | domains |    |         |       |   |   |   |      |       |   |   |   |      |     |     |     |     |     |     |     |     |     |     |     |     |     |    |    |     |     |     |    |    |     |     |          |      |      |      |      |          |      |      |
| Least        | →                                                                                                                                                                                                                                                                                                                                                                                                                                                                                                                                                                                                                                                                                                                                                  | →          | →    | Most    | Least  | →       | →        | →    | Most    |    |         |       |   |   |   |      |       |   |   |   |      |     |     |     |     |     |     |     |     |     |     |     |     |     |    |    |     |     |     |    |    |     |     |          |      |      |      |      |          |      |      |
| FEM          | ...                                                                                                                                                                                                                                                                                                                                                                                                                                                                                                                                                                                                                                                                                                                                                | ...        | MAL  |         | MAL    | ...     | ...      | FEM  |         |    |         |       |   |   |   |      |       |   |   |   |      |     |     |     |     |     |     |     |     |     |     |     |     |     |    |    |     |     |     |    |    |     |     |          |      |      |      |      |          |      |      |
| -5           | ...                                                                                                                                                                                                                                                                                                                                                                                                                                                                                                                                                                                                                                                                                                                                                | ...        | 5    |         | -2     | ...     | ...      | 2    |         |    |         |       |   |   |   |      |       |   |   |   |      |     |     |     |     |     |     |     |     |     |     |     |     |     |    |    |     |     |     |    |    |     |     |          |      |      |      |      |          |      |      |
| -*           |                                                                                                                                                                                                                                                                                                                                                                                                                                                                                                                                                                                                                                                                                                                                                    | p < 0.05   | *-   |         | -*     |         | p < 0.05 | *-   |         |    |         |       |   |   |   |      |       |   |   |   |      |     |     |     |     |     |     |     |     |     |     |     |     |     |    |    |     |     |     |    |    |     |     |          |      |      |      |      |          |      |      |
|              | <table border="0"> <tr> <td>Pathogenic</td><td>Rank</td><td>from</td><td>5</td><td>domains</td> <td>Benign</td><td>Rank</td><td>from</td><td>24</td><td>domains</td> </tr> <tr> <td>Least</td><td>→</td><td>→</td><td>→</td><td>Most</td> <td>Least</td><td>→</td><td>→</td><td>→</td><td>Most</td> </tr> <tr> <td>SAS</td><td>NFE</td><td>...</td><td>FIN</td><td>AFR</td> <td>AFR</td><td>FIN</td><td>...</td><td>NFE</td><td>SAS</td> </tr> <tr> <td>-13</td><td>-5</td><td>...</td><td>2</td><td>15</td> <td>-72</td><td>-10</td><td>...</td><td>18</td><td>53</td> </tr> <tr> <td>---</td><td>---</td><td>p &lt; 0.01</td><td>***-</td><td>***-</td> <td>---</td><td>---</td><td>p &lt; 0.01</td><td>**-*</td><td>***-</td> </tr> </table>    | Pathogenic | Rank | from    | 5      | domains | Benign   | Rank | from    | 24 | domains | Least | → | → | → | Most | Least | → | → | → | Most | SAS | NFE | ... | FIN | AFR | AFR | FIN | ... | NFE | SAS | -13 | -5  | ... | 2  | 15 | -72 | -10 | ... | 18 | 53 | --- | --- | p < 0.01 | ***- | ***- | ---  | ---  | p < 0.01 | **-* | ***- |
| Pathogenic   | Rank                                                                                                                                                                                                                                                                                                                                                                                                                                                                                                                                                                                                                                                                                                                                               | from       | 5    | domains | Benign | Rank    | from     | 24   | domains |    |         |       |   |   |   |      |       |   |   |   |      |     |     |     |     |     |     |     |     |     |     |     |     |     |    |    |     |     |     |    |    |     |     |          |      |      |      |      |          |      |      |
| Least        | →                                                                                                                                                                                                                                                                                                                                                                                                                                                                                                                                                                                                                                                                                                                                                  | →          | →    | Most    | Least  | →       | →        | →    | Most    |    |         |       |   |   |   |      |       |   |   |   |      |     |     |     |     |     |     |     |     |     |     |     |     |     |    |    |     |     |     |    |    |     |     |          |      |      |      |      |          |      |      |
| SAS          | NFE                                                                                                                                                                                                                                                                                                                                                                                                                                                                                                                                                                                                                                                                                                                                                | ...        | FIN  | AFR     | AFR    | FIN     | ...      | NFE  | SAS     |    |         |       |   |   |   |      |       |   |   |   |      |     |     |     |     |     |     |     |     |     |     |     |     |     |    |    |     |     |     |    |    |     |     |          |      |      |      |      |          |      |      |
| -13          | -5                                                                                                                                                                                                                                                                                                                                                                                                                                                                                                                                                                                                                                                                                                                                                 | ...        | 2    | 15      | -72    | -10     | ...      | 18   | 53      |    |         |       |   |   |   |      |       |   |   |   |      |     |     |     |     |     |     |     |     |     |     |     |     |     |    |    |     |     |     |    |    |     |     |          |      |      |      |      |          |      |      |
| ---          | ---                                                                                                                                                                                                                                                                                                                                                                                                                                                                                                                                                                                                                                                                                                                                                | p < 0.01   | ***- | ***-    | ---    | ---     | p < 0.01 | **-* | ***-    |    |         |       |   |   |   |      |       |   |   |   |      |     |     |     |     |     |     |     |     |     |     |     |     |     |    |    |     |     |     |    |    |     |     |          |      |      |      |      |          |      |      |
| $\alpha$ mys | <table border="0"> <tr> <td>Pathogenic</td><td>Rank</td><td>from</td><td>5</td><td>domains</td> <td>Benign</td><td>Rank</td><td>from</td><td>24</td><td>domains</td> </tr> <tr> <td>Least</td><td>→</td><td>→</td><td>→</td><td>Most</td> <td>Least</td><td>→</td><td>→</td><td>→</td><td>Most</td> </tr> <tr> <td>MAL</td><td>...</td><td>...</td><td>FEM</td><td></td> <td>FEM</td><td>...</td><td>...</td><td>MAL</td><td></td> </tr> <tr> <td>-5</td><td>...</td><td>...</td><td>5</td><td></td> <td>-6</td><td>...</td><td>...</td><td>6</td><td></td> </tr> <tr> <td>-*</td><td></td><td>p &lt; 0.01</td><td>*-</td><td></td> <td>--</td><td></td><td>p &lt; 0.05</td><td>--</td><td></td> </tr> </table>                                    | Pathogenic | Rank | from    | 5      | domains | Benign   | Rank | from    | 24 | domains | Least | → | → | → | Most | Least | → | → | → | Most | MAL | ... | ... | FEM |     | FEM | ... | ... | MAL |     | -5  | ... | ... | 5  |    | -6  | ... | ... | 6  |    | -*  |     | p < 0.01 | *-   |      | --   |      | p < 0.05 | --   |      |
| Pathogenic   | Rank                                                                                                                                                                                                                                                                                                                                                                                                                                                                                                                                                                                                                                                                                                                                               | from       | 5    | domains | Benign | Rank    | from     | 24   | domains |    |         |       |   |   |   |      |       |   |   |   |      |     |     |     |     |     |     |     |     |     |     |     |     |     |    |    |     |     |     |    |    |     |     |          |      |      |      |      |          |      |      |
| Least        | →                                                                                                                                                                                                                                                                                                                                                                                                                                                                                                                                                                                                                                                                                                                                                  | →          | →    | Most    | Least  | →       | →        | →    | Most    |    |         |       |   |   |   |      |       |   |   |   |      |     |     |     |     |     |     |     |     |     |     |     |     |     |    |    |     |     |     |    |    |     |     |          |      |      |      |      |          |      |      |
| MAL          | ...                                                                                                                                                                                                                                                                                                                                                                                                                                                                                                                                                                                                                                                                                                                                                | ...        | FEM  |         | FEM    | ...     | ...      | MAL  |         |    |         |       |   |   |   |      |       |   |   |   |      |     |     |     |     |     |     |     |     |     |     |     |     |     |    |    |     |     |     |    |    |     |     |          |      |      |      |      |          |      |      |
| -5           | ...                                                                                                                                                                                                                                                                                                                                                                                                                                                                                                                                                                                                                                                                                                                                                | ...        | 5    |         | -6     | ...     | ...      | 6    |         |    |         |       |   |   |   |      |       |   |   |   |      |     |     |     |     |     |     |     |     |     |     |     |     |     |    |    |     |     |     |    |    |     |     |          |      |      |      |      |          |      |      |
| -*           |                                                                                                                                                                                                                                                                                                                                                                                                                                                                                                                                                                                                                                                                                                                                                    | p < 0.01   | *-   |         | --     |         | p < 0.05 | --   |         |    |         |       |   |   |   |      |       |   |   |   |      |     |     |     |     |     |     |     |     |     |     |     |     |     |    |    |     |     |     |    |    |     |     |          |      |      |      |      |          |      |      |
|              | <table border="0"> <tr> <td>Pathogenic</td><td>Rank</td><td>from</td><td>26</td><td>domains</td> <td>Benign</td><td>Rank</td><td>from</td><td>20</td><td>domains</td> </tr> <tr> <td>Least</td><td>→</td><td>→</td><td>→</td><td>Most</td> <td>Least</td><td>→</td><td>→</td><td>→</td><td>Most</td> </tr> <tr> <td>SAS</td><td>AFR</td><td>...</td><td>AMR</td><td>EAS</td> <td>EAS</td><td>AMR</td><td>...</td><td>AFR</td><td>SAS</td> </tr> <tr> <td>-43</td><td>-17</td><td>...</td><td>21</td><td>65</td> <td>-47</td><td>-16</td><td>...</td><td>14</td><td>30</td> </tr> <tr> <td>---</td><td>---</td><td>p &lt; 0.01</td><td>**-*</td><td>***-</td> <td>---</td><td>---</td><td>p &lt; 0.01</td><td>**--</td><td>**--</td> </tr> </table> | Pathogenic | Rank | from    | 26     | domains | Benign   | Rank | from    | 20 | domains | Least | → | → | → | Most | Least | → | → | → | Most | SAS | AFR | ... | AMR | EAS | EAS | AMR | ... | AFR | SAS | -43 | -17 | ... | 21 | 65 | -47 | -16 | ... | 14 | 30 | --- | --- | p < 0.01 | **-* | ***- | ---  | ---  | p < 0.01 | **-- | **-- |
| Pathogenic   | Rank                                                                                                                                                                                                                                                                                                                                                                                                                                                                                                                                                                                                                                                                                                                                               | from       | 26   | domains | Benign | Rank    | from     | 20   | domains |    |         |       |   |   |   |      |       |   |   |   |      |     |     |     |     |     |     |     |     |     |     |     |     |     |    |    |     |     |     |    |    |     |     |          |      |      |      |      |          |      |      |
| Least        | →                                                                                                                                                                                                                                                                                                                                                                                                                                                                                                                                                                                                                                                                                                                                                  | →          | →    | Most    | Least  | →       | →        | →    | Most    |    |         |       |   |   |   |      |       |   |   |   |      |     |     |     |     |     |     |     |     |     |     |     |     |     |    |    |     |     |     |    |    |     |     |          |      |      |      |      |          |      |      |
| SAS          | AFR                                                                                                                                                                                                                                                                                                                                                                                                                                                                                                                                                                                                                                                                                                                                                | ...        | AMR  | EAS     | EAS    | AMR     | ...      | AFR  | SAS     |    |         |       |   |   |   |      |       |   |   |   |      |     |     |     |     |     |     |     |     |     |     |     |     |     |    |    |     |     |     |    |    |     |     |          |      |      |      |      |          |      |      |
| -43          | -17                                                                                                                                                                                                                                                                                                                                                                                                                                                                                                                                                                                                                                                                                                                                                | ...        | 21   | 65      | -47    | -16     | ...      | 14   | 30      |    |         |       |   |   |   |      |       |   |   |   |      |     |     |     |     |     |     |     |     |     |     |     |     |     |    |    |     |     |     |    |    |     |     |          |      |      |      |      |          |      |      |
| ---          | ---                                                                                                                                                                                                                                                                                                                                                                                                                                                                                                                                                                                                                                                                                                                                                | p < 0.01   | **-* | ***-    | ---    | ---     | p < 0.01 | **-- | **--    |    |         |       |   |   |   |      |       |   |   |   |      |     |     |     |     |     |     |     |     |     |     |     |     |     |    |    |     |     |     |    |    |     |     |          |      |      |      |      |          |      |      |
| mybpc3       | <table border="0"> <tr> <td>Pathogenic</td><td>Rank</td><td>from</td><td>26</td><td>domains</td> <td>Benign</td><td>Rank</td><td>from</td><td>20</td><td>domains</td> </tr> <tr> <td>Least</td><td>→</td><td>→</td><td>→</td><td>Most</td> <td>Least</td><td>→</td><td>→</td><td>→</td><td>Most</td> </tr> <tr> <td>FEM</td><td>...</td><td>...</td><td>MAL</td><td></td> <td>MAL</td><td>...</td><td>...</td><td>FEM</td><td></td> </tr> <tr> <td>-26</td><td>...</td><td>...</td><td>26</td><td></td> <td>-20</td><td>...</td><td>...</td><td>20</td><td></td> </tr> <tr> <td>-*</td><td></td><td>p &lt; 0.01</td><td>*-</td><td></td> <td>-*</td><td></td><td>p &lt; 0.01</td><td>*-</td><td></td> </tr> </table>                               | Pathogenic | Rank | from    | 26     | domains | Benign   | Rank | from    | 20 | domains | Least | → | → | → | Most | Least | → | → | → | Most | FEM | ... | ... | MAL |     | MAL | ... | ... | FEM |     | -26 | ... | ... | 26 |    | -20 | ... | ... | 20 |    | -*  |     | p < 0.01 | *-   |      | -*   |      | p < 0.01 | *-   |      |
| Pathogenic   | Rank                                                                                                                                                                                                                                                                                                                                                                                                                                                                                                                                                                                                                                                                                                                                               | from       | 26   | domains | Benign | Rank    | from     | 20   | domains |    |         |       |   |   |   |      |       |   |   |   |      |     |     |     |     |     |     |     |     |     |     |     |     |     |    |    |     |     |     |    |    |     |     |          |      |      |      |      |          |      |      |
| Least        | →                                                                                                                                                                                                                                                                                                                                                                                                                                                                                                                                                                                                                                                                                                                                                  | →          | →    | Most    | Least  | →       | →        | →    | Most    |    |         |       |   |   |   |      |       |   |   |   |      |     |     |     |     |     |     |     |     |     |     |     |     |     |    |    |     |     |     |    |    |     |     |          |      |      |      |      |          |      |      |
| FEM          | ...                                                                                                                                                                                                                                                                                                                                                                                                                                                                                                                                                                                                                                                                                                                                                | ...        | MAL  |         | MAL    | ...     | ...      | FEM  |         |    |         |       |   |   |   |      |       |   |   |   |      |     |     |     |     |     |     |     |     |     |     |     |     |     |    |    |     |     |     |    |    |     |     |          |      |      |      |      |          |      |      |
| -26          | ...                                                                                                                                                                                                                                                                                                                                                                                                                                                                                                                                                                                                                                                                                                                                                | ...        | 26   |         | -20    | ...     | ...      | 20   |         |    |         |       |   |   |   |      |       |   |   |   |      |     |     |     |     |     |     |     |     |     |     |     |     |     |    |    |     |     |     |    |    |     |     |          |      |      |      |      |          |      |      |
| -*           |                                                                                                                                                                                                                                                                                                                                                                                                                                                                                                                                                                                                                                                                                                                                                    | p < 0.01   | *-   |         | -*     |         | p < 0.01 | *-   |         |    |         |       |   |   |   |      |       |   |   |   |      |     |     |     |     |     |     |     |     |     |     |     |     |     |    |    |     |     |     |    |    |     |     |          |      |      |      |      |          |      |      |

**Fig 6.** Summary ranking matrices for  $\beta$ mys,  $\alpha$ mys, and mybpc3 compare ethnic population (upper row of matrices) or gender (lower row of matrices). The bottom row in each matrix indicates significance, p, at the 0.01 or 0.05 levels. Symbols – or \* imply insignificant (–) or significant (\*) differences between the current column population or gender and other columns in the matrix represented by the 4 (top matrices) or 2 (bottom matrices) column positions. The current column demographic is always insignificantly different from itself. Data from cardiac actin (actc1) is not shown because it did not give a significant summary ranking list.

327 *3a. Ventricular cardiac myosin ( $\beta$ mys).* Disease demographics for  $\beta$ mys SNPs correlate  
328 pathogenicity probability with population. An example for one of the QFDs is shown in **Fig 5**.  
329 Pathogenicity probability vs population is negatively correlated and approximately linear for all  
330 qualifying domains as measured by quantity *R* (**SI Table S7**). Summary rankings in **Fig 6** for  
331  $\beta$ mys has African (AFR) and Ashkenazi Jewish (ASJ) ethnic populations scoring similarly at the  
332 high end of the probability scale, to develop pathologic cardiac disease, for the myosin domains  
333 represented in each of the 24 best-of-the-best implicit models. European (EUR) and Ad Mixed  
334 American (AMR) ethnic populations are more protected from serious disease by scoring at the  
335 low end of the probability scale for pathologic outcomes. The 2 most pathogenic populations  
336 (AFR and ASJ) are significantly different from the two least pathogenic populations (EUR and  
337 AMR) for ANOVA significance testing with  $p < 0.01$ . Comparing gender (**Fig 6**), males (MAL)  
338 are more likely to develop pathogenic heart disease than females (FEM) for ANOVA  
339 significance testing with  $p < 0.05$ .  $\beta$ mys is predominant in the ventricle implying a male  
340 preference for ventricle disease. On the benign side of the probability tables, results are less  
341 definitive with most probability density for benign outcomes spread over domains inconsistently  
342 represented in the 24 best-of-the best implicit models (except for the QFDs, see next paragraph).  
343 Allele frequency is low for every population. These prognosis indicators summarized above for  
344  $\beta$ mys add personalized depth to a health plan addressing possible inheritable disease. Trends for  
345 protein domains in pathogenic or benign categories are immediately actionable for prognosis.

346 Two domains dominantly impacting disease demographics for  $\beta$ mys are QFDs with  $>1\%$   
347 of the total probability for both pathogenic and benign outcomes. They are the actin binding  
348 sites: C-loop (cl) and ELC N-terminus (en) identified in **Fig 1**. C-loop is a conserved structured  
349 loop on the surface of  $\beta$ mys that senses ATP binding, weak actin binding, and actin-activation of

350 myosin ATPase<sup>24</sup>. The C-loop participates in formation of the rigor bond with actin<sup>25</sup>. The ELC  
351 N-terminus modulates strain-dependent mechanics<sup>38</sup>. It is the site for one of two regulatory  
352 mechanisms (the other one is strain-dependent ADP release) that remixes the 3 different myosin  
353 unitary step-sizes with changed stepping frequencies in response to loading<sup>30</sup>. On board machine  
354 intelligence in  $\beta$ mys down-shifts average displacement with increasing loads by utilizing these  
355 strain-dependent regulatory mechanisms<sup>31, 39</sup>. The C-loop and ELC N-terminus QFDs have a site  
356 selective and specific response to residue substitutions in the peptide chain that are involved in  
357 cardiac disease. They are differently sensitive to ethnic population implying deeper (than the  
358  $\beta$ mys sequence) genetic and cultural factors play a role that we capture in the neural net implicit  
359 models used here to classify a large dataset and to address population dependence of disease  
360 prognosis. New research will address the deeper genetic and cultural factors in play.

361

362 *3b. Atrial cardiac myosin ( $\alpha$ mys)*. Disease demographics, summarized in **SI Fig S8** for  $\alpha$ mys  
363 SNPs, correlates pathogenicity probability with population from the 25 best-of-the-best implicit  
364 models. Pathogenicity probability vs population for  $\alpha$ mys is negatively correlated and  
365 approximately linear for all qualifying domains as measured by quantity  $R$  (**SI Table S8**).  $R$  for  
366  $\alpha$ mys occupies a higher amplitude and narrower range than for  $\beta$ mys implying a more uniform  
367 and definitive statement from the best implicit models. Pathogenic and benign outcome statistics  
368 for  $\alpha$ mys vs  $\beta$ mys are qualitatively reversed. The benign outcomes produce the more definitive  
369 findings for  $\alpha$ mys and where most probability density for pathogenic outcomes spread over  
370 domains inconsistently represented in the 25 best-of-the-best implicit models. The summary  
371 rankings in **Fig 6** for  $\alpha$ mys has South Asian (SAS) and Non-Finnish European (NFE)



372 populations scored at the higher end of the probability scale for benign cardiac disease for the  
373 myosin domains represented in each of the 25 best-of-the-best implicit models. African (AFR)  
374 and Finnish in Finland (FIN) populations score at the low end of the probability scale for benign  
375 outcomes, i.e., they are less protected from serious disease. Populations in the benign disease  
376 summary are significantly different from each other for ANOVA significance testing with  $p <$   
377 0.01. Female (FEM) populations score higher for pathogenic outcomes compared to male (MAL)  
378 populations with the difference significant at the  $p < 0.01$  level. The latter MAL/FEM ordering is  
379 also reflected in the probability scores of the benign outcomes.  $\alpha$ mys is predominant in the  
380 atrium implying a female preference for atrium disease. Gender inequality for  $\alpha$ - and  $\beta$ mys  
381 suggests that atrium centric inheritable cardiac disease is more detrimental to women's health  
382 while ventriculum centric inheritable cardiac disease is more detrimental to men's health. The  
383 results again suggest deep genetic and cultural factors play a role in the cardiac disease that we  
384 capture in the neural net implicit models used here to classify a large dataset and to address  
385 population dependence of disease prognosis.

386 **SI Table S8** for  $\alpha$ mys indicates that five QFDs impact disease demographics for  $\alpha$ mys.  
387 They are the ELC N-terminus (en, **Fig 1**), lever arm (la, **Fig 1**), ELC binding IQ domain on the  
388 lever arm (qe), and k7 and k5 that are large (200 and 400 residue) default domains corresponding  
389 to 27k and 50k molecular weight fragments produced by proteolysis at unstructured loops 1 and  
390 2 (l1 and l2). The ELC N-terminus is the single QFD that presents in both ventriculum and  
391 atrium centric inheritable diseases and is the largest contributor to probability in both  $\alpha$ - and  
392  $\beta$ mys. ELC is intimately involved in myosin strain-dependent mechanics<sup>38</sup>, its binding to the IQ  
393 domain (qe) stabilizes the lever arm<sup>40</sup>, and it is critical for the native folding of the myosin  
394 heavy chain after translation<sup>41</sup>. The lever arm (la) converts torque generated in the motor domain



395 of myosin into linear displacement of actin. It is the ultimate determinant of the myosin step-size  
396 <sup>42</sup>. The k7 and k5 domains qualify as QFDs due to the size of their contribution to pathogenicity  
397 probabilities but are heterogeneous with respect to function as their sequences flank SH3 (h3)  
398 and the active site (ac) in k7, and, several of the actin binding sites in k5. The k7 and k5 are  
399 default domains that are assigned SNPs whose location falls outside the sequence range of other  
400 more specifically functionally identified domains. Identification of k7 and k5 as QFDs suggest  
401 that sequence assignment to functional domains needs further scrutiny possibly to involve a  
402 larger part of the protein sequence in SH3, active site, and actin binding domain in the heavy  
403 chain.

404

405 *3c. Cardiac myosin binding protein C (mybpc3)*. Disease demographics are summarized in **SI**  
406 **Fig S9**. Mybpc3 domains contributing substantially to the pathogenicity probabilities far  
407 outnumber those in  $\beta$ mys and  $\alpha$ mys implying the protein and its human host readily tolerates  
408 these variations that measurably impact function. Pathogenicity probability vs population for  
409 mybpc3 is negatively correlated and approximately linear for all qualifying domains as measured  
410 by quantity *R* (**SI Table S9**). The summary rankings in **Fig 6** for mybpc3 has East Asian (EAS)  
411 and Ad Mixed American (AMR) populations are most likely, while South Asian (SAS) and  
412 African (AFR) populations least likely to suffer pathologic cardiac disease for the mybpc3  
413 domains represented in each of the 25 best-of-the-best implicit models. The benign pathogenicity  
414 outcomes (right matrix **SI Fig S9**) trend identically by favoring South Asian (SAS) and African  
415 (AFR) while disfavoring East Asian (EAS) and Ad Mixed American (AMR) populations.  
416 Prognosis is significantly impacted by gender. Female (FEM) populations always fare better than

417 Male (MAL) counterparts for pathogenic outcomes. Summary distinctions between ethnic  
418 populations and genders are significant at the  $p < 0.01$  level.

419 Four QFDs (c0, c1, l2 and c10) for mybpc3 (out of 20) are especially notable (see **SI Fig**  
420 **S9**). The c0-c1-l2-c2 Ig-like and linker domains at the mybpc3 N-terminus transiently bind  
421 myosin<sup>12</sup>, while c1 and l2 (l2 also called M-domain containing 4 phosphorylation sites),  
422 transiently bind actin<sup>13-17</sup> (see **Fig 1**). The c10 (cx) Ig-like domain on the mybpc3 C-terminus  
423 binds to LMM<sup>17</sup> anchoring mybpc3 to the thick filament (**Figs 1 & 3**). The binding sites  
424 facilitate actomyosin translation velocity modulation in a mechanism regulated by mybpc3  
425 phosphorylation in the l2 linker<sup>18, 43-45</sup>. Transient mybpc3 N-terminus/actin binding imitates  
426 transient ELC N-terminus/actin binding<sup>46</sup> by targeting the same site on the actin surface (**Fig 1**)  
427 implying they compete for it within the C-zone. Actin binding of the ELC N-terminus performs a  
428 strain dependent down-shifting of myosin based displacement by altering the relative frequency  
429 of the three  $\beta$ mys step-sizes<sup>31, 47</sup>. The specific effect of mybpc3 actin binding and competition  
430 with ELC on myosin step-size in the C-zone is unknown. Total probability for SNPs to  
431 contribute to pathogenicity is larger for *c1* than any other QFD in mybpc3 attesting to its central  
432 significance in the implicit disease mechanisms coded in the best-of-the-best neural network  
433 models.

434

435 *3d. Cardiac actin (actc1)*. Disease demographics for actin summarized in **SI Fig S10** are the  
436 simplest of the four cardiac sarcomeric proteins studied. The statistics do not identify any QFDs  
437 because there is little data on the actin SNPs, possibly because the human protein has few natural  
438 SNPs that are not lethal to the fetus. They identify just one domain, the ring-rich loop (rr), with a

439 very substantial contribution to pathogenicity. Pathogenicity probability vs population for  
440 cardiac actin is negatively correlated and approximately linear for all qualifying domains as  
441 measured by  $R$  (SI Fig S10). No summary ranking of demographics equivalent to those in Fig 6  
442 is possible in this case. The ring-rich loop is not implicated in F-actin intermolecular interactions  
443 possibly allowing individuals with SNPs in that domain to survive longer although the associated  
444 cardiac disease is pathological. Actin sequences are highly conserved between skeletal (acta1)  
445 and cardiac (actc1) isoforms implying that additional data relevant to cardiac function might be  
446 gleaned from SNPs in the skeletal actin although notable structural<sup>48</sup> and functional  
447 characteristics<sup>31</sup> differentiate them possibly complicating disease models.

448

449

450

451

452 4. DISCUSSION

453 Myosin is the engine powering the beating heart. Its motor domain transducer located  
454 within the heavy chain contains ATP and actin binding sites, and, mechanical elements coupling  
455 motor generated torque to the myosin filament backbone for transduction/mechanical coupling.  
456 The mechanical coupler is an  $\alpha$ -helical lever arm, stabilized by essential and regulatory light  
457 chains (ELC and RLC), that rotates to impel strongly bound actin filaments (**Fig 1**). Linear actin  
458 displacement from unitary lever arm rotation produces a unitary displacement (step-size) that  
459 responds to conditions in real time by using a second cyclical interaction between actin and the  
460 ELC N-terminus<sup>22, 29</sup> to modulate step-size length<sup>47</sup>. Myosin in the contraction cycle adapts to  
461 changing power demands by regulating contractile force and velocity using 3 distinctive unitary  
462 step-sizes with step-size choice decided mainly by load<sup>47</sup>. Down-shifting average step-size  
463 changes myosin from a high-displacement transducer for high velocity auxotonic shortening into  
464 a low-displacement transducer maintaining tension in near-isometric contraction<sup>39</sup>. Native  
465 myosin functionality could require the structured environment and proximity to ancillary protein  
466 components in the muscle sarcomere such as mypb3, or, might fully replicate its native  
467 behavior *in vitro* as a purified, isolated, and independent motor translating actin. Whether force-  
468 velocity regulation is a systemic property of the sarcomere or an intrinsic property of an  
469 autonomous myosin impacts approached to researching disease mechanisms.

470

471 *Sarcomere protein integration explains demographic/SNP-pathogenicity correlation.*

472 *In vitro* single myosin mechanical characterization uses purified and isolated myosin and  
473 reveals a telling correspondence between *in vitro* and *in vivo* systems that indicates myosin is to

474 some extent an autonomous molecule such that the cardiac myosin is functionally the muscle in a  
475 molecule<sup>47</sup>. Autonomous myosin codes its mechanism for real time force-velocity regulation  
476 into the protein sequence that was captured in a Neural/Bayes network model<sup>34</sup>. Single residue  
477 sequence variation from a SNP in myosin or mybpc3 is a common cause of inheritable heart  
478 disease that affects people worldwide. Our earlier work developed a machine intelligence model  
479 for disease that implicitly characterized SNP impacts on function providing a predictive  
480 Neural/Bayes network model for SNP variation disease pathogenicity. Predictability contingent  
481 on an autonomous motor implies that a SNP in the motor has implications independent of  
482 demographics providing the protein sequence is otherwise conserved. Moreover,  
483 structure/function studies of the motor always assume myosin motor autonomy. Now we  
484 involved human demographics in SNP classification and find pathogenicity correlates with  
485 human subpopulations and gender. Our realization that mybpc3 forms a third actomyosin  
486 interaction competing with the ELC N-terminus ratchet<sup>30</sup> implies a new strain-dependent  
487 mechanism outside the myosin molecule modulating motor adaptation to load. The new  
488 predictive Neural/Bayes network model for myosin, mybpc3, and actin variation disease  
489 pathogenicity, developed here from *in vivo* human data involving the population genetic/cultural  
490 background and gender, promises a more realistic statistical prognosis. This working model, and  
491 the integral myosin/mybpc3 motor concept, implies some of the wider considerations involved in  
492 understanding heart disease as a systemic maladaptation.

493 Earlier work introduced a systemic heart disease mechanism to explain how widely  
494 spatially distributed point mutations in myosin, mybpc3, or actin cause specific and unique  
495 motor functional alterations but induce a common phenotype such as hypertrophic  
496 cardiomyopathy<sup>49</sup>. Single soleus muscle fibers carrying  $\beta$ mys mutations in the converter domain

497 had substantial and significantly higher contractile variability compared to normal control  
498 muscle fibers due to variation in mutant allele frequency (af) among individual cells in the tissue  
499 <sup>50</sup>. In the heart it was proposed that contractile force imbalance due to unequal fractions of  
500 mutated and wildtype protein among individual cardiomyocytes over time induces cardiac  
501 remodeling and hypertrophic cardiomyopathy.

502         The M-band contains connective elements in the sarcomere important for managing force  
503 imbalances during active muscle contraction. It has a role as shock absorber in contracting  
504 muscle dealing with dynamic mechanical stress by changing its protein composition in response  
505 to changing demands <sup>51</sup>. It is an adaptive substructure of the sarcomere responding to disease  
506 related altered myosin, mybpc3, or actin function that is itself probably impacted by  
507 demographic variation. The M-band is a potential addition to the integral myosin/mybpc3 motor  
508 concept comprising the actual autonomous contractile system.

509

510 *Alternative role for mybpc3.*

511         Mybpc3 is the third actomyosin crosslinker after the myosin heavy chain and ELC in  
512 striated muscle and is now proposed to impact motor strain-dependent mechanics. Its multi-  
513 component structure for actomyosin connectivity has the C-terminus Ig-like domain (cx)  
514 anchored to the myosin thick filament and the c0-c1-l2-c2 N-terminus domains (l2 is a linker  
515 including 4 phosphorylation sites involved in regulation sometimes called the M-domain)  
516 engaged in transient binding to myosin (**Fig 1**). Each subdomain element in the connectivity  
517 mechanism, except c2, is a QFD by analysis of the relationship of their SNPs to disease  
518 pathogenicity independently suggesting they are critical to function. The atrial and ventricle

519 motor proteins ( $\alpha$ - and  $\beta$ mys) both identify the ELC N-terminus as a QFD while  $\alpha$ mys also  
520 identifies its complementary Iq-domain for ELC binding as a QFD implying connecting sites  
521 from myosin heavy chain-to-ELC-to-actin are necessary for native functionality. An analogous  
522 situation occurs in mybpc3 with the *cx* anchor to myosin (equivalent to the ELC site that binds  
523 the lever arm Iq-domain) and transient actin binding activity site c0-c1-l2-c2 (equivalent to the  
524 ELC N-terminus in myosin) qualifying as QFDs (except for c2) forming the connectinons  
525 necessary for strain regulation. The N-terminus of ELC and the N-terminus of mybpc3 appear to  
526 compete for the binding site on actin (**Fig 1**) implying they competitively influence myosin  
527 strain-dependent mechanics. Mybpc3 could sterically disrupt the normal actin/ELC interaction in  
528 the C-zone or involve itself as an integral part of an independent myosin strain-dependent  
529 mechanism. New experimental work investigating these possibilities will address the impact of  
530 the mybpc3 on loaded myosin contractility in the context of single myosin mechanics as done  
531 previously for the ELC N-terminus/actin interaction<sup>30, 47</sup>.

532

### 533 *Demographic inequalities in heart disease*

534 Implicit neural network modeling of human disease mechanisms from nonsynonymous  
535 SNPs located in cardiac myosins ( $\alpha$ - and  $\beta$ mys) and mybpc3 finds that demographics  
536 significantly influence heart disease pathology. Similar modeling for cardiac actin was  
537 inconclusive probably because of insufficient SNP data. Considering just myosin and mybpc3  
538 findings, SNPs in these proteins collectively favor pathogenic outcomes in the African (AFR) or  
539 East Asian (EAS) populations while favoring benign outcomes in the South Asian (SAS) and Ad  
540 Mixed American (AMR) populations. These findings are a basis for assessing an individual's

541 risk for a particular sequence variant and population group. Statistically significant gender bias in  
542 mybpc3 has males (MAL) developing more pathological disease from closely related SNPs when  
543 compared to females (FEM). Statistically significant gender bias in  $\beta$ - and  $\alpha$ mys suggests  
544 pathological and benign outcomes from closely related SNPs in these proteins correlate with  
545 pathological outcomes favoring male ventriculum and female atrium and with benign outcomes  
546 favoring male atrium and female ventriculum. This observation has value when evaluating risk  
547 from heart contractility metrics since it shows atrial or ventricular functional impairment has  
548 different implications for women or men.

549

550



551 5. CONCLUSION

552 SNPs cause unique residue substitutions in the functional domains of ventricular myosin ( $\beta$ mys),  
553 atrial myosin ( $\alpha$ mys), mybpc3, and actin (actc1). Independent SNP characteristics of domain  
554 location, residue substitution, demographic, and allele frequency predict their dependent  
555 phenotype and pathogenicity using a feed-forward neural network model (**Fig 2**). The NCBI SNP  
556 database was mined to assign known independent and dependent discrete variables in 6  
557 dimensional data points (fulfilled 6ddps) for each protein. The latter train and validate the neural  
558 network models that can then predict phenotype and pathogenicity for any single residue  
559 substitution in myosin, mybpc3, or actin. The SNP database also contains a majority of 6ddps  
560 having one or both dependent data points unknown (unfulfilled 6ddps). Unfulfilled 6ddps are  
561 predicted using the neural network models. A discrete Bayes network interprets combined  
562 fulfilled and predicted 6ddps with conditional probabilities for phenotype or pathogenicity given  
563 independent SNP characteristics. This Neural/Bayes network forecasting tests pathogenicity vs  
564 demographics of mutations in the protein domains and finds pathogenicity correlates with human  
565 subpopulations and gender. The latter implies functional cardiac motor health depends on  
566 myosin and ancillary protein components from the muscle sarcomere. In addition, the graphic  
567 realization that mybpc3 forms a third actomyosin interaction competing with the ELC N-  
568 terminus ratchet (**Fig 1**) implies a new strain-dependent mechanism outside myosin that  
569 contributes to motor adaptation to load. Our working models, and the integral myosin/mybpc3  
570 motor concept, portends the wider considerations involved in understanding heart disease as a  
571 systemic maladaptation.

572

573 6. ACKNOWLEDGEMENT

574 The author thanks Kevin Neff for writing the original Perl script for automated SNP extraction  
575 from the NCBI SNP database and Katalin Ajtai for scientific discussion and critical review of the  
576 manuscript.

577

578 7. SUPPLEMENTARY INFORMATION

579 Supplementary information (SI) consists of ten tables: **Tables S1-S10**, and four data sets for the  
580 fulfilled and unknown 6ddps from 2 myosins, mybpc3, and actc1. **SI Tables S7-S10** are  
581 contained in files: MYH7summary.pdf, MYH6summary.pdf, mybpc3summary.pdf, and  
582 actc1summary.pdf. **Data Sets 1-4** are contained in files: 6ddpMYH7.xls, 6ddpMYH6.xls,  
583 6ddpMYBPC3.xls, 6ddpACTC1.xls.

584

585 8. DISCLOSURES

586 None

587

588 9. REFERENCES

- 589 [1] Murakami, K., Yasunaga, T., Noguchi, T. Q. P., Gomibuchi, Y., Ngo, K. X., Uyeda, T. Q. P.,  
590 and Wakabayashi, T. (2010) Structural Basis for Actin Assembly, Activation of ATP  
591 Hydrolysis, and Delayed Phosphate Release, *Cell* 143, 275-287.
- 592 [2] Al-Khayat, H. A., Kensler, R. W., Squire, J. M., Marston, S. B., and Morris, E. P. (2013)  
593 Atomic model of the human cardiac muscle myosin filament, *Proc. Natl. Acad. Sci. USA*  
594 110, 318-323.
- 595 [3] Rayment, I., and Holden, H. M. (1993) Myosin subfragment-1: structure and function of a  
596 molecular motor, *Curr. Opin. Struct. Biol.* 1993, 944-952.
- 597 [4] Lowey, S., Waller, G. S., and Trybus, K. M. (1993) Function of skeletal muscle myosin  
598 heavy and light chain isoforms by an in vitro motility assay, *J. Biol. Chem.* 268, 20414-  
599 20418.
- 600 [5] Sherwood, J. J., Waller, G. S., Warshaw, D. M., and Lowey, S. (2004) A point mutation in  
601 the regulatory light chain reduces the step size of skeletal muscle myosin, *Proc. Natl.*  
602 *Acad. Sci. USA* 101, 10973-10978.
- 603 [6] Pant, K., Watt, J., Greenberg, M., Jones, M., Szczesna-Cordary, D., and Moore, J. R. (2009)  
604 Removal of the cardiac myosin regulatory light chain increases isometric force  
605 production, *The FASEB Journal* 23, 3571-3580.

- 606 [7] Wang, L., Muthu, P., Szczesna-Cordary, D., and Kawai, M. (2013) Characterizations of  
607 myosin essential light chain's N-terminal truncation mutant  $\Delta 43$  in transgenic mouse  
608 papillary muscles by using tension transients in response to sinusoidal length alterations,  
609 *J. Muscle Res. Cell Motil.* 34, 93-105.
- 610 [8] Sadayappan, S., and de Tombe, P. P. (2012) Cardiac myosin binding protein-C: redefining its  
611 structure and function, *Biophysical Reviews* 4, 93-106.
- 612 [9] Ababou, A., Rostkova, E., Mistry, S., Masurier, C. L., Gautel, M., and Pfuhl, M. (2008)  
613 Myosin Binding Protein C Positioned to Play a Key Role in Regulation of Muscle  
614 Contraction: Structure and Interactions of Domain C1, *J. Mol. Biol.* 384, 615-630.
- 615 [10] Moolman-Smook, C. J., Flashman, E., de Lang, W., Li, Z., Corfield, V. A., Redwood, C.,  
616 and Watkins, H. (2002) Identification of Novel Interactions Between Domains of Myosin  
617 Binding Protein-C That Are Modulated by Hypertrophic Cardiomyopathy Missense  
618 Mutations, *Circ. Res.* 91, 704-711.
- 619 [11] Singh, R. R., Dunn, J. W., Qadan, M. M., Hall, N., Wang, K. K., and Root, D. D. (2017)  
620 Whole length myosin binding protein C stabilizes myosin S2 as measured by  
621 gravitational force spectroscopy, *Arch. Biochem. Biophys.* 638, 41-51.
- 622 [12] Ratti, J., Rostkova, E., Gautel, M., and Pfuhl, M. (2011) Structure and Interactions of  
623 Myosin-binding Protein C Domain C0: Cardiac-Specific Regulation of Myosin at Its  
624 Neck?, In *J. Biol. Chem.*, pp 12650-12658.

- 625 [13] Moos, C., Mason, C. M., Besterman, J. M., Feng, I. N. M., and Dubin, J. H. (1978) The  
626 binding of skeletal muscle C-protein to F-actin, and its relation to the interaction of actin  
627 with myosin subfragment-1, *J. Mol. Biol.* 124, 571-586.
- 628 [14] Whitten, A. E., Jeffries, C. M., Harris, S. P., and Trehwella, J. (2008) Cardiac myosin-  
629 binding protein C decorates F-actin: Implications for cardiac function, *Proceedings of the*  
630 *National Academy of Sciences* 105, 18360-18365.
- 631 [15] Inchingolo, A. V., Previs, S. B., Previs, M. J., Warshaw, D. M., and Kad, N. M. (2019)  
632 Revealing the mechanism of how cardiac myosin-binding protein C N-terminal fragments  
633 sensitize thin filaments for myosin binding, *Proceedings of the National Academy of*  
634 *Sciences*, 201816480.
- 635 [16] Luther, P. K., Winkler, H., Taylor, K., Zoghbi, M. E., Craig, R., Pedron, R., Squire, J. M.,  
636 and Liu, J. (2011) Direct visualization of myosin-binding protein C bridging myosin and  
637 actin filament in intact muscle, *Proc. Nat. Acad. Sci. USA* 108, 11423-11428.
- 638 [17] Lee, K., Harris, S. P., Sadayappan, S., and Craig, R. (2015) Orientation of Myosin Binding  
639 Protein C in the Cardiac Muscle Sarcomere Determined by Domain-Specific Immuno-  
640 EM, *J. Mol. Biol.* 427, 274-286.
- 641 [18] Previs, M. J., Previs, S. B., Gulick, J., Robbins, J., and Warshaw, D. M. (2012) Molecular  
642 Mechanics of Cardiac Myosin-Binding Protein C in Native Thick Filaments, *Science* 337,  
643 1215-1218.

- 644 [19] Walcott, S., Docken, S., and Harris, Samantha P. (2015) Effects of Cardiac Myosin Binding  
645 Protein-C on Actin Motility Are Explained with a Drag-Activation-Competition Model,  
646 *Biophys. J.* 108, 10-13.
- 647 [20] McNamara, J. W., Li, A., Lal, S., Bos, J. M., Harris, S. P., van der Velden, J., Ackerman, M.  
648 J., Cooke, R., and dos Remedios, C. G. (2017) MYBPC3 mutations are associated with a  
649 reduced super-relaxed state in patients with hypertrophic cardiomyopathy, *PLoS ONE* 12,  
650 e0180064.
- 651 [21] Kabsch, W., Mannherz, H. G., Suck, D., Pai, E. F., and Holmes, K. C. (1990) Atomic  
652 structure of the actin:DNase I complex, *Nature* 347, 37-44.
- 653 [22] Aydt, E. M., Wolff, G., and Morano, I. (2007) Molecular modeling of the myosin-S1(A1)  
654 isoform, *J. Struct. Biol.* 159, 158-163.
- 655 [23] Lorenz, M., and Holmes, K. C. (2010) The actin-myosin interface, *Proc. Nat. Acad. Sci.*  
656 *USA* 107, 5.
- 657 [24] Ajtai, K., Garamszegi, S. P., Park, S., Velazquez Dones, A. L., and Burghardt, T. P. (2001)  
658 Structural characterization of  $\beta$ -cardiac myosin subfragment 1 in solution, *Biochemistry*  
659 40, 12078-12093.

- 660 [25] Ajtai, K., Garamszegi, S. P., Watanabe, S., Ikebe, M., and Burghardt, T. P. (2004) The  
661 myosin cardiac loop participates functionally in the actomyosin interaction, *J. Biol.*  
662 *Chem.* 279, 23415-23421.
- 663 [26] Uyeda, T. Q. P., Ruppel, K. M., and Spudich, J. A. (1994) Enzymatic activities correlate  
664 with chimaeric substitutions at the actin-binding face of myosin, *Nature* 368, 567-569.
- 665 [27] Geeves, M. A., Fedorov, R., and Manstein, D. J. (2005) Molecular mechanism of  
666 actomyosin-based motility, *Cell. Mol. Life Sci.* 62, 1462-1477.
- 667 [28] Hayashibara, T., and Miyanishi, T. (1994) Binding of the amino-terminal region of myosin  
668 alkali I light chain to actin and its effect on actin-myosin interaction, *Biochemistry* 33,  
669 12821-12827.
- 670 [29] Morano, I., Ritter, O., Bonz, A., Timek, T., Vahl, C. F., and Michel, G. (1995) Myosin light  
671 chain-actin interaction regulates cardiac contractility, *Circ. Res.* 76, 720-725.
- 672 [30] Wang, Y., Ajtai, K., Kazmierczak, K., Szczesna-Cordary, D., and Burghardt, T. P. (2015)  
673 N-terminus of Cardiac Myosin Essential Light Chain Modulates Myosin Step-Size,  
674 *Biochemistry* 55, 186-198.
- 675 [31] Wang, Y., Ajtai, K., and Burghardt Thomas, P. (2018) Cardiac and skeletal actin substrates  
676 uniquely tune cardiac myosin strain-dependent mechanics, *Open Biology* 8, 180143.

- 677 [32] Winkelmann, D. A., Forgacs, E., Miller, M. T., and Stock, A. M. (2015) Structural basis for  
678 drug-induced allosteric changes to human [beta]-cardiac myosin motor activity, *Nature*  
679 *Communications* 6, 7974.
- 680 [33] Planelles-Herrero, V. J., Hartman, J. J., Robert-Paganin, J., Malik, F. I., and Houdusse, A.  
681 (2017) Mechanistic and structural basis for activation of cardiac myosin force production  
682 by omecamtiv mecarbil, *Nature Communications* 8, 190.
- 683 [34] Burghardt, T. P., and Ajtai, K. (2018) Neural/Bayes network predictor for inheritable  
684 cardiac disease pathogenicity and phenotype, *J Molec Cell Cardiol* 119, 19-27.
- 685 [35] Monera, O. D., Sereda, T. J., Zhou, N. E., Kay, C. M., and Hodges, R. S. (1995)  
686 Relationship of sidechain hydrophobicity and  $\alpha$ -helical propensity on the stability of the  
687 single-stranded amphipathic  $\alpha$ -helix, *Journal of Peptide Science* 1, 319-329.
- 688 [36] Newell, K., Smith, W., Ghoshhajra, B., Isselbacher, E., Lin, A., and Lindsay, M. E. (2017)  
689 Cervical artery dissection expands the cardiovascular phenotype in FBN1-related Weill–  
690 Marchesani syndrome, *American Journal of Medical Genetics Part A* 173, 2551-2556.
- 691 [37] van der Linde, D., van de Laar, I. M. B. H., Bertoli-Avella, A. M., Oldenburg, R. A.,  
692 Bekkers, J. A., Mattace-Raso, F. U. S., van den Meiracker, A. H., Moelker, A., van  
693 Kooten, F., Frohn-Mulder, I. M. E., Timmermans, J., Moltzer, E., Cobben, J. M., van  
694 Laer, L., Loeys, B., De Backer, J., Coucke, P. J., De Paepe, A., Hilhorst-Hofstee, Y.,  
695 Wessels, M. W., and Roos-Hesselink, J. W. (2012) Aggressive Cardiovascular Phenotype



- 696 of Aneurysms-Osteoarthritis Syndrome Caused by Pathogenic SMAD3 Variants, *J. Am.*  
697 *Coll. Cardiol.* 60, 397-403.
- 698 [38] Wang, Y., Ajtai, K., and Burghardt, T. P. (2013) Qdot labeled actin super-resolution  
699 motility assay measures low duty cycle muscle myosin step-size, *Biochemistry* 52, 1611-  
700 1621.
- 701 [39] Burghardt, T. P., Sun, X., Wang, Y., and Ajtai, K. (2017) Auxotonic to Isometric  
702 Contraction Transitioning in a Beating Heart Causes Myosin Step-Size to Down Shift,  
703 *PLoS ONE* 12, e0174690.
- 704 [40] Lossie, J., Köhncke, C., Mahmoodzadeh, S., Steffen, W., Canepari, M., Maffei, M., Taube,  
705 M., Larchevêque, O., Baumert, P., Haase, H., Bottinelli, R., Regitz-Zagrosek, V., and  
706 Morano, I. (2014) Molecular mechanism regulating myosin and cardiac functions by  
707 ELC, *Biochem. Biophys. Res. Commun.* 450, 464-469.
- 708 [41] Onishi, H., Maeda, K., Maeda, Y., Inoue, A., and Fujiwara, K. (1995) Functional chicken  
709 gizzard heavy meromyosin expression in and purification from baculovirus-infected  
710 insect cells, *Proceedings of the National Academy of Sciences* 92, 704-708.
- 711 [42] Uyeda, T. Q. P., Abramson, P. D., and Spudich, J. A. (1996) The neck region of the myosin  
712 motor domain acts as a lever arm to generate movement, *Proc. Nat. Acad. Sci. USA* 93,  
713 4459-4464.

- 714 [43] Previs, M. J., Prosser, B. L., Mun, J. Y., Previs, S. B., Gulick, J., Lee, K., Robbins, J., Craig,  
715 R., Lederer, W. J., and Warshaw, D. M. (2015) Myosin-binding protein C corrects an  
716 intrinsic inhomogeneity in cardiac excitation-contraction coupling, *Science Advances* 1,  
717 e1400205.
- 718 [44] Kensler, R. W., Craig, R., and Moss, R. L. (2017) Phosphorylation of cardiac myosin  
719 binding protein C releases myosin heads from the surface of cardiac thick filaments,  
720 *Proceedings of the National Academy of Sciences* 114, E1355-E1364.
- 721 [45] O'Leary, T. S., Snyder, J., Sadayappan, S., Day, S. M., and Previs, M. J. (2018) MYBPC3  
722 truncation mutations enhance actomyosin contractile mechanics in human hypertrophic  
723 cardiomyopathy, *J. Mol. Cell. Cardiol.*
- 724 [46] Petzhold, D., Simsek, B., Meißner, R., Mahmoodzadeh, S., and Morano, I. (2014) Distinct  
725 interactions between actin and essential myosin light chain isoforms, *Biochem. Biophys.*  
726 *Res. Commun.* 449, 284-288.
- 727 [47] Wang, Y., Yuan, C. C., Kazmierczak, K., Szczesna-Cordary, D., and Burghardt, T. P.  
728 (2018) Single Cardiac Ventricular Myosins are Autonomous Motors, *Open Biology* 8,  
729 170240.
- 730 [48] Orbán, J., Lőrinczy, D., Nyitrai, M., and Hild, G. (2008) Nucleotide dependent differences  
731 between the  $\alpha$ -skeletal and  $\alpha$ -cardiac actin isoforms, *Biochem. Biophys. Res. Commun.*  
732 368, 696-702.

- 733 [49] Kraft, T., and Montag, J. (2019) Altered force generation and cell-to-cell contractile  
734 imbalance in hypertrophic cardiomyopathy, *Pflugers Arch - Eur J Physiol*.
- 735 [50] Brenner, B., Seebohm, B., Tripathi, S., Montag, J., and Kraft, T. (2014) Familial  
736 hypertrophic cardiomyopathy: functional variance among individual cardiomyocytes as a  
737 trigger of FHC-phenotype development, *Frontiers in Physiology* 5, 392.
- 738 [51] Lange, S., Pinotsis, N., Agarkova, I., and Ehler, E. (2019) The M-band: The underestimated  
739 part of the sarcomere, *Biochimica et Biophysica Acta (BBA) - Molecular Cell Research*.
- 740
